# Supplementary material for: Novel O-Methylglucoside Derivatives of Flavanone in Interaction with Model Membrane and Transferrin
Source: MDPI journal article supplement (doi:10.3390/membranes12100978), 2022-10-08
Supplement: s1 [file s1]

Supplementary Materials

# Novel O-Methylglucoside Derivatives of Flavanone in Interaction with Model Membrane and Transferrin

Sylwia Cyboran-Mikołajczyk <sup>1,\*</sup>, Dorota Bonarska-Kujawa <sup>1</sup>, Katarzyna Męczarska <sup>1</sup>, Agnieszka Krawczyk-Łebek <sup>2</sup> and Edyta Kostrzewa-Susłow <sup>2</sup>

<sup>1</sup> Department of Physics and Biophysics, Wrocław University of Environmental and Life Sciences, Norwida 25, 50-375 Wrocław, Poland

<sup>2</sup> Department of Food Chemistry and Biocatalysis, Wrocław University of Environmental and Life Sciences, Norwida 25, 50-375 Wrocław, Poland

\* Correspondence: sylwia.cyboran@upwr.edu.pl

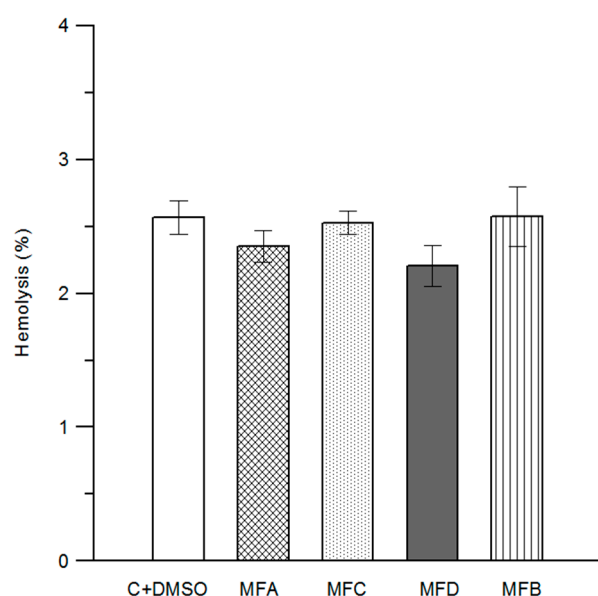

**Figure S1.** The percentage of hemolysis of RBC in the absence (C + DMSO) and in the presence of MFA, MFB, MFC, and MFD compounds used at 50  $\mu$ M concentration. The experiment was carried out in five replicates, the results were presented as mean  $\pm$  standard deviation.

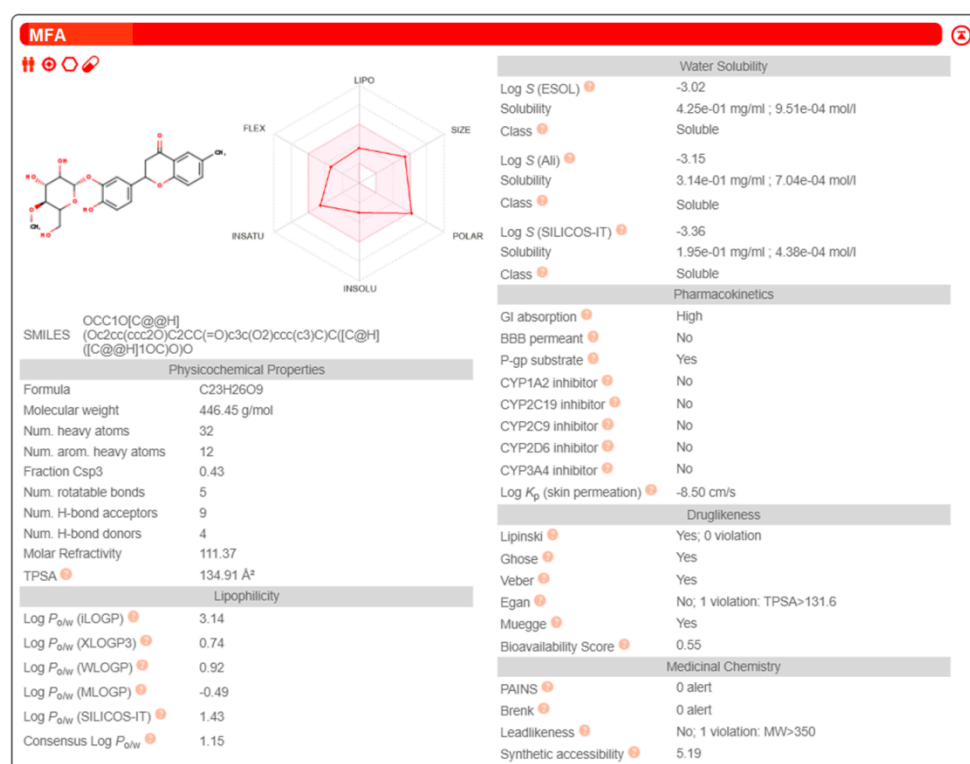

**Figure S2.** The physicochemical properties of 4'-hydroxy-6-methylflavanone 3'-O-β-D-(4''-O-methyl)-glucopyranoside (MFA) compound obtained by computational simulation performed with using SwissADME based on the compounds structural formulae.

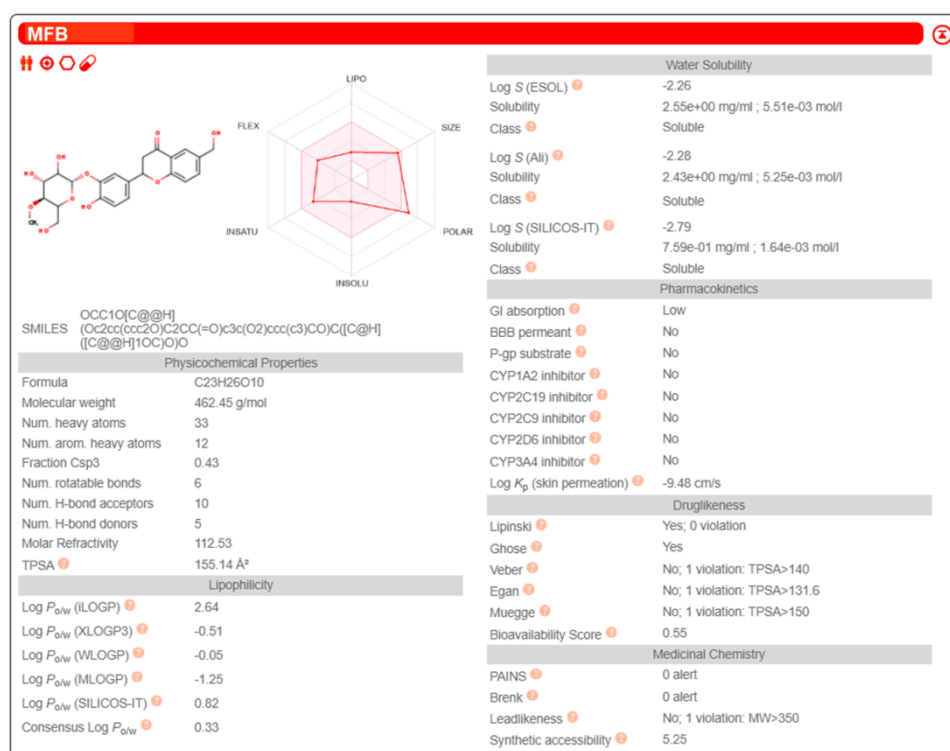

**Figure S3.** The physicochemical properties of 4'-hydroxy-6-hydroxymethylflavanone 3'-O-β-D-(4''-O-methyl)-glucopyranoside (MFB) compound obtained by computational simulation performed with using SwissADME based on the compounds structural formulae.

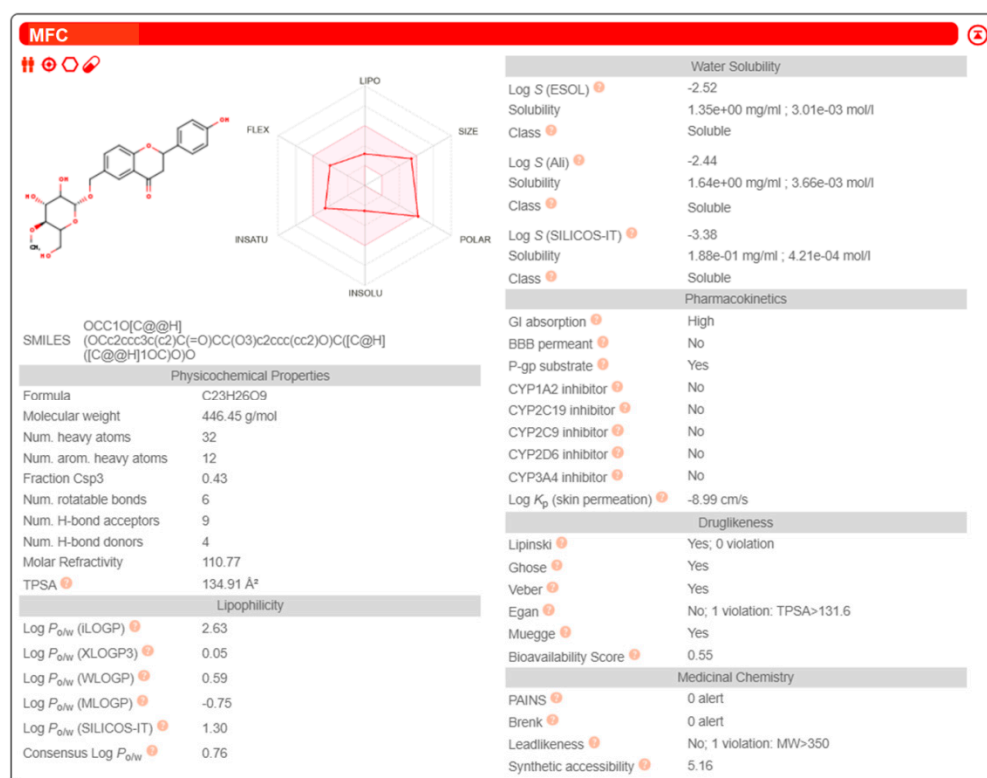

**Figure S4.** The physicochemical properties of 4'-hydroxyflavanone 6-methylene-O-β-D-(4''-O-methyl)-glucopyranoside (MFC) compound obtained by computational simulation performed with using SwissADME based on the compounds structural formulae.

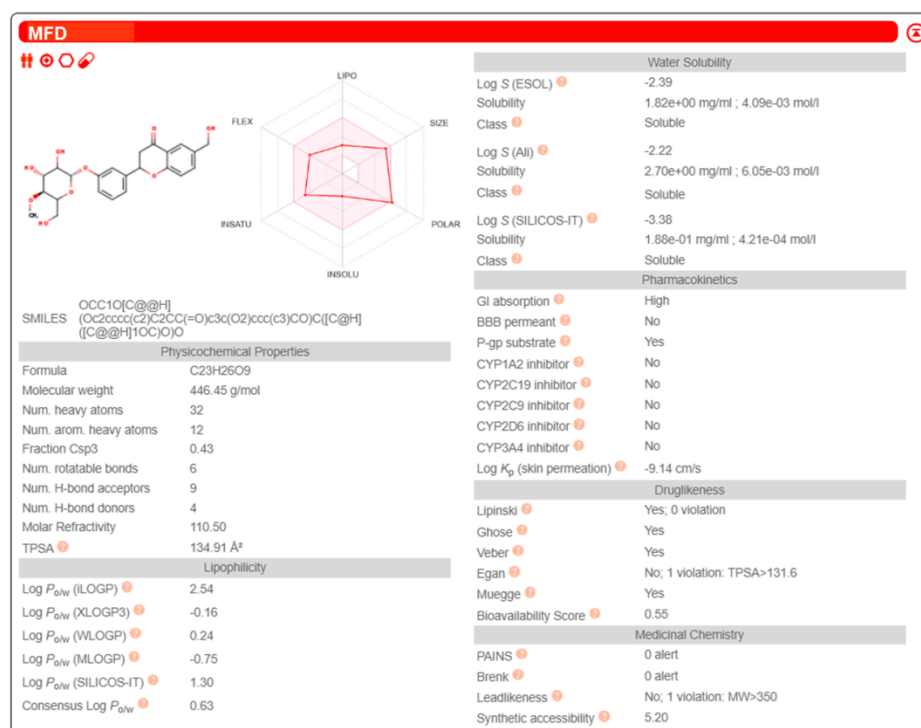

**Figure S5.** The physicochemical properties of 6-hydroxymethylflavanone 3'-O-β-D-(4''-O-methyl)-glucopyranoside (MFD) compound obtained by computational simulation performed with using SwissADME based on the compounds structural formulae.
